# Supplementary material
Source: PubMed Central journal article supplement (PMC4217475)
Supplement: pnas.201320644SI.pdf [file pnas.201320644SI.pdf]

# Supporting Information

Ding et al. 10.1073/pnas.1320644111

## SI Materials and Methods

### Analysis of Supercoils Constrained by CI-Mediated Looping of Plasmids.

Before nicking a mixture (320  $\mu$ L) containing 0.156 nM of negatively supercoiled DNA template and 170 nM or various concentrations of wild-type  $\lambda$  repressor (CI) in 20 mM Tris-acetate (pH 7.9 at 25  $^{\circ}$ C), 50 mM potassium acetate, 10 mM magnesium acetate, 1 mM DTT was assembled on ice and incubated for 30 min at 37  $^{\circ}$ C. Then, the supercoiled DNA templates were digested by 20 units of Nb.BbvCI at 37  $^{\circ}$ C for 15 s. Next, a large excess (289 nM) of a double-stranded oligonucleotides containing the Nb.BbvCI recognition site (top strand, 5'-CGGCATGGCG-GCCCTATGCTGAGGACTCGGCCGACGCGCT-3') was added to the reaction mixtures to inhibit further plasmid digestion. The nicked DNA templates were ligated using 800 units of T4 DNA ligase in the presence of 1 mM ATP at 37  $^{\circ}$ C for 5 min, and the reaction was terminated by extraction with an equal volume of phenol. Plasmids were precipitated in ethanol and dissolved in 25  $\mu$ L of 10 mM Tris-HCl buffer (pH 8.5). The ligated DNA products were separated using 1% agarose gel electrophoresis in the absence or presence of 1  $\mu$ g/mL chloroquine, and the superhelicity of topoisomers was calculated from the gel images stained with ethidium bromide using KODAK 1D Image Analysis Software. Experiments were repeated three times, and the results were averaged.

### Determining the Superhelical Density of Supercoiled Plasmids Before Addition of CI.

One hundred-microliter mixtures containing 1.5  $\mu$ g of negatively supercoiled DNA template, 200 nM *Escherichia coli* DNA topoisomerase I, and various concentrations of ethidium bromide in 20 mM Tris-acetate (pH 7.9 at 25  $^{\circ}$ C), 50 mM potassium acetate, 10 mM magnesium acetate, 1 mM DTT, and 10  $\mu$ g/mL BSA were assembled on ice and incubated for 15 min at 37  $^{\circ}$ C. The reactions were terminated by extraction with an equal volume of phenol. The DNA topoisomers were isolated and subjected to 1% agarose gel electrophoresis in the absence or presence of 0.5, 1, or 2.5  $\mu$ g/mL of chloroquine for the determination of the supercoiling density (1).

### Preparation of DNA Tethers for Magnetic Tweezers.

DNA constructs for magnetic-tweezers experiments were formed by tether segments of either 4.4, 4.9, or 5.5 kbp containing the  $\lambda$  oL and oR regulatory regions ligated to biotin-labeled and digoxigenin-labeled attachment fragments at opposite ends using T4 DNA ligase [New England Biolabs (NEB)]. Tether segments with four different separations between the oL3 and oR3 sites (loop lengths) were produced (see Tables S1 and S2 and Dataset S1 for DNA constructs). Biotin- or digoxigenin-labeled end fragments of 800–1,000 bp were created using PCR (KOD Hot Start Polymerase kit; Novagen) with the appropriate primer pairs and templates (Tables S1 and S2) to incorporate about 5–10% (mol/mol) biotin- or digoxigenin-labeled dUTP. Double digestions were used to generate complementary ends for ligation to the central DNA fragments. All restriction enzymes were from NEB.

The DNA constructs were attached at one end to the anti-digoxigenin-coated glass surface of a flow chamber and at the other end to a 1.0- $\mu$ m-diameter streptavidin-coated, paramagnetic bead (Dynabead MyOne Streptavidin T1; Invitrogen). Multiple biotin-streptavidin or digoxigenin-anti-digoxigenin bonds at bead and glass surfaces, respectively, torsionally constrained the tethers. Flow microchambers of  $\sim$ 50- $\mu$ L volume were assembled between two glass coverslips spaced by double-sided scotch tape and lined with silicon grease. Before experiments, DNA tethers were

incubated for at least 1 h at either room temperature or 4  $^{\circ}$ C in  $\lambda$  buffer (10 mM Tris-HCl, pH 7.4, 0.1 mM EDTA, 200 mM KCl, 0.2 mM DTT, 5% DMSO, and 0.2 mg/mL  $\alpha$ -casein).

**Manipulation of DNA Tethers with Magnetic Tweezers.** For single-molecule experiments, DNA was stretched and twisted using a pair of permanent magnets on a mount above the microscope stage, which could be both translated along and rotated about the optical axis of the microscope. First, torsionally constrained, single DNA tethers were identified by twisting. The tethers were unwound to  $\sigma \sim -10\%$  ( $-42$  turns for  $\sim$ 4,950-bp DNA), re-wound to  $+10\%$ , unwound to  $-10\%$  again, and unwound back to 0 in steps of three turns while recording the extension. These extension vs. twist curves were symmetric for both undertwisting and overtwisting at low tension, 0.2 pN, as plectonemes formed and reduced the extension. Instead under high tension,  $\sim$ 3 pN, although plectonemes still formed with overtwisting, undertwisted DNA underwent a phase transition to denatured or left-handed helices and the maxima of such curves indicated the contour lengths of torsionally relaxed DNA (2). Multiply tethered beads that do not exhibit this phase change were discarded. Then, single tethers were gently stretched at low tension and twisted after the addition of CI protein diluted in  $\lambda$  buffer to a final concentration of 160 nM (393-bp loops) or 200 nM (all other loops). Wild-type CI protein from the laboratory of Sankar Adhya (NIH, Bethesda, MD) was used for experiments with 393-bp loops, and a His-tagged CI (3) provided by Keith Shearwin (University of Adelaide, Adelaide, SA, Australia) was used with all other loops. Wild-type and His-tagged CI proteins behave identically in looping experiments *in vitro* (4). Two types of experiments were performed. In one, the tether extension as a function of mechanically introduced twist, was recorded at constant tensions between 0.1 and  $\sim$ 0.8 pN without protein present. Then it was repeated with CI to detect the superhelical density ( $\sigma_L$ ) constrained in  $\lambda$  repressor-mediated loops that formed spontaneously in extensively twisted DNA. The value of  $\sigma_L$  was equal to the shift (units of turns) of the reduced extension vs. twist curve divided by the number of helical turns in a relaxed DNA segment of the length of the loop,  $Lk_0$ . In another experiment, extension was recorded with or without CI protein as a function of time under constant tensions and levels of  $\sigma$  to monitor spontaneous loop formation and breakdown. In this case, useful values of  $\sigma$  were limited to a range without extensive plectoneme formation in which unlooped and looped states were distinct.

**Analysis of Magnetic Tweezer Data.** Using video-rate, 3D tracking, X, Y, and Z coordinates of mobile (tethered) and nonspecifically stuck beads were acquired at 10 frames per s. From the extension of the tether along the microscope axis and the transverse excursions of the tethered bead perpendicular to the direction of the magnetic field, the tension in the molecule was determined using the equipartition theorem. The time vs. extension data were then analyzed to identify probable looping events. A Matlab-coded “change-point” algorithm and expectation-maximization routine (5, 6) was used to parse the time series for looped and unlooped states without filtering or averaging which limit the time resolution. The looped ( $\tau_L$ ) and unlooped ( $\tau_U$ ) lifetimes and the associated uncertainties were determined by optimization of the maximum-likelihood function for an exponential distribution with at least 150 data points. The energy associated with looping under various tension and twist conditions

was calculated using  $\Delta G/kT = -\ln(\tau_L/\tau_U)$ . Error bars were 99% confidence intervals for mean lifetimes determined from the

exponential fit or the propagation of errors from lifetime measurements in the calculation of looping energies.

- Clark DJ, Leblanc B (2009) Analysis of DNA supercoiling induced by DNA-protein interactions. *Methods Mol Biol* 543:523–535.
- Sarkar A, Léger JF, Chatenay D, Marko JF (2001) Structural transitions in DNA driven by external force and torque. *Phys Rev E Stat Nonlin Soft Matter Phys* 63(5 Pt 1):051903.
- Nickels BE, Dove SL, Murakami KS, Darst SA, Hochschild A (2002) Protein-protein and protein-DNA interactions of  $\sigma 70$  region 4 involved in transcription activation by lambda cl. *J Mol Biol* 324(1):17–34.
- Gao N, Shearwin K, Mack J, Finzi L, Dunlap D (2013) Purification of bacteriophage lambda repressor. *Protein Expr Purif* 91(1):30–36.
- Manzo C, Finzi L (2010) Quantitative analysis of DNA-looping kinetics from tethered particle motion experiments. *Methods In Enzymology*, ed Nils GW (Academic, San Diego), Vol 475, pp 199–220.
- Watkins LP, Yang H (2005) Detection of intensity change points in time-resolved single-molecule measurements. *J Phys Chem B* 109(1):617–628.

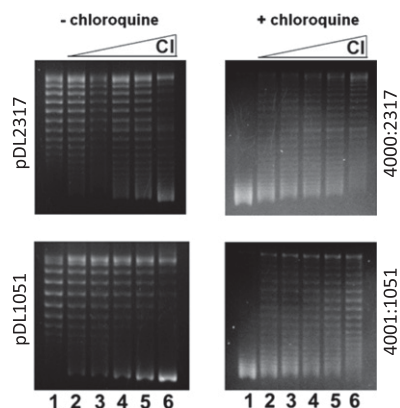

**Fig. S1.**  $\lambda$  repressor (Cl) divided supercoiled plasmids into two independent topological domains. The DNA-nicking assays were performed as described in *Materials and Methods*. In addition to 0.156 nM of either plasmid pDL1051 or pDL2317 with intact/nicked segments of 4,001:1,051 or 4,000:2,317 bp, the reaction mixtures also contained 0, 10, 20, 52, 80, or 170 nM  $\lambda$  cl (lanes 1–6, respectively) and Nb.BbvCI (20 units). The DNA molecules (topoisomers) were isolated and subjected to agarose gel electrophoresis in absence (–) or presence (+) of 2.5  $\mu$ g/mL chloroquine. Leftmost lanes (1) contains DNA relaxed at 37 °C and slightly (+) supercoiled because the gels were run at 24 °C.

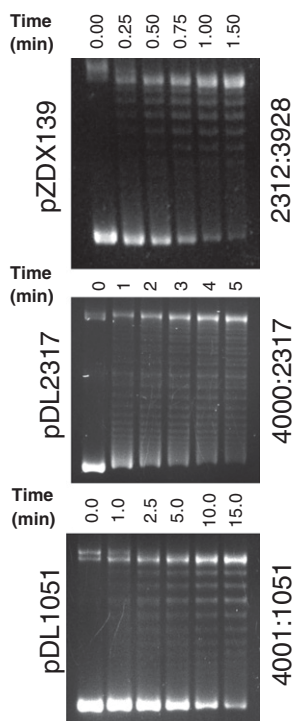

**Fig. S2.** DNA-nicking assays in the presence of 170 nM Cl were performed as described in *Materials and Methods* with incubation at 37 °C. At the indicated times, the DNA was isolated and topoisomers were separated using agarose gel electrophoresis without chloroquine.

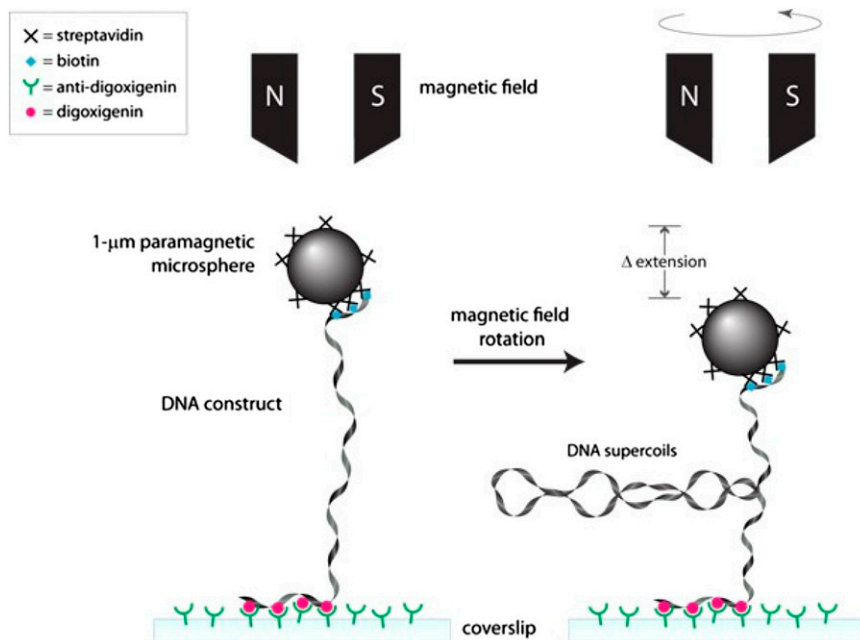

**Fig. S3.** Schematic diagram of a magnetic tweezer apparatus used to twist and stretch DNA (not to scale). A streptavidin-labeled, paramagnetic microsphere is tethered to an anti-digoxigenin-coated glass surface using DNA labeled at opposite ends with biotin and digoxigenin. Permanent dipole magnets brought to within a few millimeters induce a dipole in the microsphere to attract and rotationally orient it. This generates slight tension in the DNA tether, which can be modulated by changing the separation between the magnets and the bead. Turning the magnets turns the rotationally coupled microsphere and twists the DNA which eventually can form plectonemes (supercoils). Monica Fernandez (Department of Physics, Emory University, Atlanta) kindly allowed us to use the illustration in Fig. S3.







**Table S2. Primer sequences**

| Primer name    | DNA sequence, 5' to 3'                                                 |
|----------------|------------------------------------------------------------------------|
| NAR            | TCCAGAGGCGCCCTCACCGGCTCCAGATTATCAGCAATAAACAGCCAGCCGGAAGGGCCGAGCGC      |
| NHE            | TGGTAAGCTAGCCTGGGGCCAGATGGTAAGCCCTCCCGTATCGTAGTTATCTACACGACGGGGAGTCAGG |
| λbiotailR      | TAAGCAGAAGGCCATCCTG                                                    |
| λbiotailF      | CTGCCTCTTTCTCTCACGG                                                    |
| λdigitailR     | CTGGCCCTGCTTATTACAGGATGTGCTCAACAGACGTTTACTGTTCAAAAACAAACCG             |
| λdigitailF     | CTGATAACGGACGTCAGAAAACAGAAATCATGGTTATGACGTCATTGTAGGCGGAGAGC            |
| S/pDL2317/2526 | TGTATGGAACAACGCATAAC                                                   |
| S/pDL2317/3645 | TCCAAACTGGAACAACAC                                                     |
| A/208-12/337   | TGGCGTAATAGCGAAGAG                                                     |
| S/pUC19/2019   | TGCACAACATGGGGGATCAT                                                   |
| dig-control    | GACTGATAGTGACCTGTTTCGTTGCAACAAATTGATAAGCAATGC                          |
| S/pUC19/2412   | TGGGTGAGCAAAAACAGGAAGGCA                                               |
| A/pUC19/1435   | CGTAATCTGCTGCTTGCAA                                                    |

## Other Supporting Information Files

[Dataset S1 \(PDF\)](#)
