# Supplementary material
Source: PubMed Central journal article supplement (PMC4217475)
Supplement: pnas.1320644111.sd01.pdf [file pnas.1320644111.sd01.pdf]

Mon Jun 09, 2014 23:53 -0400  
pDL950.gb  
Text Map

```

          10      20      30      40      50      60      70      80      90     100
  *   *   *   *   *   *   *   *   *   *   *   *   *   *   *   *
1 GAATTCtgcacctcttccagggttaatttttaagagcgtcaccttcagtgggtgagtcgctcctgctgatgtgctcagTATCACC GCCAGTGGTAttta 100
                                            >>>>>>>>>>>>>>>
                                            OL1

          110      120      130      140      150      160      170      180      190     200
  *   *   *   *   *   *   *   *   *   *   *   *   *   *   *   *
101 tgtCAACACCGCCAGAGATAattTATCACC GCAGATGGTtctgtatgttttttatatgaattattttttgcaggggggcattgtttgtaggtgaga 200
  >>>>>>>>>>>>>>>>
  OL2
          >>>>>>>>>>>>>>>
          OL3

          210      220      230      240      250      260      270      280      290     300
  *   *   *   *   *   *   *   *   *   *   *   *   *   *   *   *
201 gatctgaattgctatgtttagtgagttgtatctatttttttcaataatacaattggttatgtgttttggggcgatcgtgaggcaagaaaacccgg 300

          310      320      330      340      350      360      370      380      390     400
  *   *   *   *   *   *   *   *   *   *   *   *   *   *   *   *
301 cgctgaggccgggttattctgttctcgtgcaaatatagttggaatacaaggatgcataatgaatgaacgatgcagaggcaatgccgatggcgat 400

          410      420      430      440      450      460      470      480      490     500
  *   *   *   *   *   *   *   *   *   *   *   *   *   *   *   *
401 agtgggtatcatgtagccgcttagctggaagaagaataaacccgcagaaaaaaaagctccaagctcaacaaaactaagggatagacaataactacc 500

          510      520      530      540      550      560      570      580      590     600
  *   *   *   *   *   *   *   *   *   *   *   *   *   *   *   *
501 gatgtcatatacccatactctctaatcttggccagtcgccccgttctgcttccgattagaaacgtcaaggcagcaatcaggattgcaatcatggttctctg 600

          610      620      630      640      650      660      670      680      690     700
  *   *   *   *   *   *   *   *   *   *   *   *   *   *   *   *
601 catatgatgacaatgtcgcccaagaccatctctatgagctgaaaaaagaacaccaggaaatgtagtggcggaaaaggagatagcaaatgcttacgataac 700

          710      720      730      740      750      760      770      780      790     800
  *   *   *   *   *   *   *   *   *   *   *   *   *   *   *   *
701 gtaaggaattattactatgtaaacaccaggcatgattctgttccgcataattactcctgataattaatccttaactttgcccacctgccttttaaacat 800

          810      820      830      840      850      860      870      880      890     900
  *   *   *   *   *   *   *   *   *   *   *   *   *   *   *   *
801 tccagtatatcacctttcatttctgctgagaatagccatctcttcagctatctcagcattggtgacctgtttcagaggcctgagagatggccttttt 900

          910      920      930      940      950      960      970      980      990     1000
  *   *   *   *   *   *   *   *   *   *   *   *   *   *   *   *
901 ctgatagataatgttctgtaaaaatctccggcctcatcttttcccgcaggctaatagtctgaaaattgaggtgacgggttaaaaaataatctcctggc 1000

          1010      1020      1030      1040      1050      1060      1070      1080      1090     1100
  *   *   *   *   *   *   *   *   *   *   *   *   *   *   *   *
1001 aaccttttttatatcctcttttaaattttggcttaatgactatataccaatgagtcaaaaagctcccctcaatatctggtgccctaagacctttaata 1100

          1110      1120      1130      1140      1150      1160      1170      1180      1190     1200
  *   *   *   *   *   *   *   *   *   *   *   *   *   *   *   *
1101 tcgccaaatacaggtagcttggcttctaccttcaccgcttggcggcagatgaaatgcataaacatcgtctttgggtggtccctcatcagtggt 1200

          1210      1220      1230      1240      1250      1260      1270      1280      1290     1300
  *   *   *   *   *   *   *   *   *   *   *   *   *   *   *   *
1201 ctatctgaacgcgctctccactgcttaatgacattccttcccgattaaaaaatctgtcagatcggtggtggccccgaaaacagtttctggcaaac 1300

          1310      1320      1330      1340      1350      1360      1370      1380      1390     1400
  *   *   *   *   *   *   *   *   *   *   *   *   *   *   *   *
1301 aatggtgctgccttcaacaacaaaaaagatgggaatcccaatgattcgtcatctgaggctggttcttaatatcttcaactgaagctttagagcgattt 1400

          1410      1420      1430      1440      1450      1460      1470      1480      1490     1500
  *   *   *   *   *   *   *   *   *   *   *   *   *   *   *   *
1401 atcttctgaaccagactccttgctcattgtttggtaagagaaaagttttccatcgattttatgaatatacaaaataattggagccaacctgcaggtgat 1500

          1510      1520      1530      1540      1550      1560      1570      1580      1590     1600
  *   *   *   *   *   *   *   *   *   *   *   *   *   *   *   *
1501 gattatcagccagcagagaattaaggaaaacagacaggtttattgagcgttatcttccctttatcttggctgcggttaagtcgataaaaaccattctt 1600
```



































```

            5810    5820    5830    5840    5850    5860    5870    5880    5890    5900
            *  *  *  *  *  *  *  *  *  *  *  *  *  *  *  *  *  *  *  *
5801 acaatttcacacaggaaacagctatgaccatgattacgaatttaatacgactcactatagggatttctagaccttcccgttccgctcaagttagtataa 5900
      >>>>>>>>>>>>>>>>>>>>>>>>>>>>>>>>>>>>>>>>>>>>>>>>>>>>>>>>>>>>>>>>>>>>>>>>>>>>>>>>>>>>>>>>>>>>>>>>>
            M13-rev                                T7

            5910    5920    5930    5940    5950    5960    5970    5980    5990    6000
            *  *  *  *  *  *  *  *  *  *  *  *  *  *  *  *  *  *  *  *
5901 aaaagcaggcttcaacggagctcgtcgaccgggtaccggttgaatactcatactcttcctttttcaatattattgaagcatttaccagggttattgtctc 6000

            6010    6020    6030    6040    6050    6060    6070    6080    6090    6100
            *  *  *  *  *  *  *  *  *  *  *  *  *  *  *  *  *  *  *  *
6001 atgagcggatacatatttgaatgtatttagaaaaataaacaagagttttagaaaacgaaaaaggccatccgtcaggatggccttctgttaatttga 6100

            6110    6120    6130    6140    6150    6160    6170    6180    6190    6200
            *  *  *  *  *  *  *  *  *  *  *  *  *  *  *  *  *  *  *  *
6101 tgcctggcagtttatggcgggctcctgcccgccaccctccgggcggttgcttcgcaacgttcaaatccgctcccggcgatttgcctactcaggagag 6200

            6210    6220    6230    6240    6250    6260    6270    6280    6290    6300
            *  *  *  *  *  *  *  *  *  *  *  *  *  *  *  *  *  *  *  *
6201 cgttcacgcacaaacaacagataaaaacgaaaggccagcttttcgactgagcctttcgttttatttgatgcctggcagttccctactctcgcatggggag 6300

            6310
            *  *  *
6301 accccacactaccatcgg 6318

```

Mon Jun 09, 2014 23:55 -0400  
pZDX139.gb  
Text Map

```
          10       20       30       40       50       60       70       80       90      100
*   *   *   *   *   *   *   *   *   *   *   *   *   *   *   *   *   *   *   *   *
1 GAATTCTGCCCTTCTTCAGGGCTTAATTTTTAAGAGCGTCACCTTTCATGGTGGTCAGTCGCTCTCGTATGTGCTCAGTATCACC GCCAGTGGTATTTA 100
                                          >>>>>>>>>>>>>>>>>>>
                                          OL1

          110      120      130      140      150      160      170      180      190      200
*   *   *   *   *   *   *   *   *   *   *   *   *   *   *   *   *   *   *   *
101 TGTCAACACCCGCCAGATAAATTATCACC GCCAGTGGTATCTGTATGTTTTTATATGAATTTATTTTGCAGGGGGCCATTGTTTGGTAGGTGAGA 200
>>>>>>>>>>>>>>>>>>>
OL2

                         >>>>>>>>>>>>>>>>>>>
                         OL3

          210      220      230      240      250      260      270      280      290      300
*   *   *   *   *   *   *   *   *   *   *   *   *   *   *   *   *   *   *
201 GATCTGACGGCAGTTATCTGGAAGATCAGGATATGTGGCGGATGAGCGGCATTTCCGTGACGCTCTCGTTGCTGCATAAACCCGACTACACAAATCAGCGA 300

          310      320      330      340      350      360      370      380      390      400
*   *   *   *   *   *   *   *   *   *   *   *   *   *   *   *   *   *   *
301 TTTCCATGTTGCCACTCGCTTTAATGATGATTTTACGCCGCCTGTACTGAGGGCTGAAATTCAGATGTGCGCGAGTTGCGTGACTACCTACGGGTAACA 400

          410      420      430      440      450      460      470      480      490      500
*   *   *   *   *   *   *   *   *   *   *   *   *   *   *   *   *   *   *
401 GTTTCTTTATGGCAGGGTGAACACGAGGTGCCAGCGCCACCCGCCTTTCCGGCGTGAAATTTATCGATGAGCGTGGTGGTTATGCCGATCGCGTCACAC 500

          510      520      530      540      550      560      570      580      590      600
*   *   *   *   *   *   *   *   *   *   *   *   *   *   *   *   *   *   *
501 TACGTCTGAACCGTGAACCCGAAACTGTGGAGCGCCGAAATCCCGAAATCTCTATCGTGCGGTGGTTGAACTGCACACCCGCCGACGGCAGCTGATTGA 600

          610      620      630      640      650      660      670      680      690      700
*   *   *   *   *   *   *   *   *   *   *   *   *   *   *   *   *   *   *
601 AGCAGAAGCCTGCGATGTCGGTTTCCGCGAGGTGCGGATGAAATGGTCTGCTGCTGCTGTAACGGCAAGCCGTGCTGATTGAGGGCGTTAACCCGTCAC 700

          710      720      730      740      750      760      770      780      790      800
*   *   *   *   *   *   *   *   *   *   *   *   *   *   *   *   *   *   *
701 GAGCATCATCTCTGCATGGTCAGGTATGAGATGAGCAGACGATGGTGCAGGATATCCTGCTGATGAAGCAGAACAACCTTTAACGCCGTGCGCTGTTCCG 800

          810      820      830      840      850      860      870      880      890      900
*   *   *   *   *   *   *   *   *   *   *   *   *   *   *   *   *   *   *
801 ATTATCCGAACCATCCGCTGTGGTACAGCTGTGCGACCCTACCGCCTGTATGTGGTGGATGAAGCCAATATTGAAACCCAGCGCATGGTCCAAATGAA 900

          910      920      930      940      950      960      970      980      990     1000
*   *   *   *   *   *   *   *   *   *   *   *   *   *   *   *   *   *   *
901 TCGTCTGACCGATGATCCGGCTGGCTACCGCGATGAGCGAACCGGTAACGCGAATGGTGAGCGCGATCGTAATCACCCGAGTGATCATCTGGTTCG 1000

          1010     1020     1030     1040     1050     1060     1070     1080     1090     1100
*   *   *   *   *   *   *   *   *   *   *   *   *   *   *   *   *   *   *
1001 CTGGGGAATGAATCAGGCCACGGCGCTAATCACGACCGCTGTATCGTGGATCAAATCTGTGATCCTTCCCGCCGGTGACAGTATGAAGGGCGGGAG 1100

          1110     1120     1130     1140     1150     1160     1170     1180     1190     1200
*   *   *   *   *   *   *   *   *   *   *   *   *   *   *   *   *   *   *
1101 CCGACACCACGGCCACCGATATTATTGCCCAGATGTACGCGCGGTGATGAAGACCAGCCCTTCCCGCTGTGCCGAAATGGTCCATAAAAAATGGCT 1200

          1210     1220     1230     1240     1250     1260     1270     1280     1290     1300
*   *   *   *   *   *   *   *   *   *   *   *   *   *   *   *   *   *   *
1201 TTCGCTACCTGGAGAGACGCCCGCTGATCCTTTGCGAATACGCCACCGGATGGGTAACAGTCTTGGCGGTTTCGCTAAATACTGGCAGGGCTTTCGT 1300

          1310     1320     1330     1340     1350     1360     1370     1380     1390     1400
*   *   *   *   *   *   *   *   *   *   *   *   *   *   *   *   *   *   *
1301 CAGTATCCCGGTTTACAGGGCGGCTTCGTCTGGGACTGGGTGGATCAGTCTGATTAAAATATGATGAAAACGGCAACCCGTTGGTCTTACGGCGGTTG 1400

          1410     1420     1430     1440     1450     1460     1470     1480     1490     1500
*   *   *   *   *   *   *   *   *   *   *   *   *   *   *   *   *   *   *
1401 ATTTTGGCGATACGCCAACGATCGCCAGTCTGTATGAACGGTCTGGTCTTTGCGGACCCGACGCGCATCCAGCGCTGACGGAAGCAAAAACACCGAGA 1500

          1510     1520     1530     1540     1550     1560     1570     1580     1590     1600
*   *   *   *   *   *   *   *   *   *   *   *   *   *   *   *   *   *   *
1501 GCAGTTTTTCCAGTTCGGTTTATCCGGGCAACCATCGAAGTGACCAGCGAATACCTGTCCGTCATAGCGATAACGAGCTCCTGCACTGGATGGTGGCG 1600
```







```

      5810      5820      5830      5840      5850      5860      5870      5880      5890      5900
* * * * *
5801 CGTTTCGCTCAAGTTAGTATAAAAAAGCAGGCTTCAACGGAGCTCGTCGACCCGGGTACCGTTGAATACTCATACTCTTCCTTTTCAATATTATTGAAG 5900

      5910      5920      5930      5940      5950      5960      5970      5980      5990      6000
* * * * *
5901 CATTATCAGGGTTATTGTCTCATGAGCGGATACATATTTGAATGTATTTAGAAAAATAAACAAAAGAGTTTGTAGAAACGCAAAAAGGCCATCCGTCAG 6000

      6010      6020      6030      6040      6050      6060      6070      6080      6090      6100
* * * * *
6001 GATGGCCTTCTGCTTAATTTGATGCCTGGCAGTTTATGGCGGGCGTCTGCCGCCACCCTCCGGGCCGTTGCTTCGCAACGTTCAAATCCGCTCCCGGC 6100

      6110      6120      6130      6140      6150      6160      6170      6180      6190      6200
* * * * *
6101 GGATTTGCTCTACTCAGGAGAGCGTTACCGACAAACAACAGATAAAAACGAAAGGCCAGTCTTTGCGACTGAGCCTTTCGTTTTATTTGATGCCTGGCAG 6200

      6210      6220      6230      6240
* * * * *
6201 TTCCTACTCTCGCATGGGAGACCCACACTACCATCGG 6240

```
